# Supplementary material
Source: publisher figshare collection journal article supplement (https://acs.figshare.com/ndownloader/files/3801265)
Supplement: Supplementary file 1 [file 3801265]

  
data_m 
  
_audit_creation_method            SHELXL-97 
_chemical_name_systematic 
; 
 ? 
; 
_chemical_name_common             ? 
_chemical_melting_point           ? 
_chemical_formula_moiety          ? 
_chemical_formula_sum 
 'C24 H20 F3 N3 O2' 
_chemical_formula_weight          439.43 
  
loop_ 
 _atom_type_symbol 
 _atom_type_description 
 _atom_type_scat_dispersion_real 
 _atom_type_scat_dispersion_imag 
 _atom_type_scat_source 
 'C'  'C'   0.0033   0.0016 
 'International Tables Vol C Tables 4.2.6.8 and 6.1.1.4' 
 'H'  'H'   0.0000   0.0000 
 'International Tables Vol C Tables 4.2.6.8 and 6.1.1.4' 
 'N'  'N'   0.0061   0.0033 
 'International Tables Vol C Tables 4.2.6.8 and 6.1.1.4' 
 'O'  'O'   0.0106   0.0060 
 'International Tables Vol C Tables 4.2.6.8 and 6.1.1.4' 
 'F'  'F'   0.0171   0.0103 
 'International Tables Vol C Tables 4.2.6.8 and 6.1.1.4' 
  
_symmetry_cell_setting            Monoclinic 
_symmetry_space_group_name_H-M    C2/c 
  
loop_ 
 _symmetry_equiv_pos_as_xyz 
 'x, y, z' 
 '-x, y, -z+1/2' 
 'x+1/2, y+1/2, z' 
 '-x+1/2, y+1/2, -z+1/2' 
 '-x, -y, -z' 
 'x, -y, z-1/2' 
 '-x+1/2, -y+1/2, -z' 
 'x+1/2, -y+1/2, z-1/2' 
  
_cell_length_a                    28.3226(19) 
_cell_length_b                    10.5984(7) 
_cell_length_c                    16.3567(8) 
_cell_angle_alpha                 90.00 
_cell_angle_beta                  113.507(3) 
_cell_angle_gamma                 90.00 
_cell_volume                      4502.4(5) 
_cell_formula_units_Z             8 
_cell_measurement_temperature     203(2) 
_cell_measurement_reflns_used     5255 
_cell_measurement_theta_min       2.30 
_cell_measurement_theta_max       26.84 
  
_exptl_crystal_description        block 
_exptl_crystal_colour             colorless 
_exptl_crystal_size_max           0.30 
_exptl_crystal_size_mid           0.15 
_exptl_crystal_size_min           0.05 
_exptl_crystal_density_meas       ? 
_exptl_crystal_density_diffrn     1.297 
_exptl_crystal_density_method     'not measured' 
_exptl_crystal_F_000              1824 
_exptl_absorpt_coefficient_mu     0.101 
_exptl_absorpt_correction_type    multi-scan 
_exptl_absorpt_correction_T_min   0.9704 
_exptl_absorpt_correction_T_max   0.9950 
_exptl_absorpt_process_details    SADABS 
  
_exptl_special_details 
; 
 ? 
; 
  
_diffrn_ambient_temperature       203(2) 
_diffrn_radiation_wavelength      0.71073 
_diffrn_radiation_type            MoK\a 
_diffrn_radiation_source          'fine-focus sealed tube' 
_diffrn_radiation_monochromator   graphite 
_diffrn_measurement_device_type   'Bruker X8 APEX II diffractometer' 
_diffrn_measurement_method        'phi and omega scans' 
_diffrn_detector_area_resol_mean  ? 
_diffrn_standards_number          0 
_diffrn_standards_interval_count  ? 
_diffrn_standards_interval_time   ? 
_diffrn_standards_decay_%         ? 
_diffrn_reflns_number             22086 
_diffrn_reflns_av_R_equivalents   0.0355 
_diffrn_reflns_av_sigmaI/netI     0.0355 
_diffrn_reflns_limit_h_min        -37 
_diffrn_reflns_limit_h_max        37 
_diffrn_reflns_limit_k_min        -14 
_diffrn_reflns_limit_k_max        14 
_diffrn_reflns_limit_l_min        -21 
_diffrn_reflns_limit_l_max        21 
_diffrn_reflns_theta_min          2.08 
_diffrn_reflns_theta_max          28.28 
_reflns_number_total              5544 
_reflns_number_gt                 3644 
_reflns_threshold_expression      >2sigma(I) 
  
_computing_data_collection        'Bruker APEX2' 
_computing_cell_refinement        'Bruker SAINT+' 
_computing_data_reduction         'Bruker SAINT+' 
_computing_structure_solution     'SHELXS-97 (Sheldrick, 1990)' 
_computing_structure_refinement   'SHELXL-97 (Sheldrick, 1997)' 
_computing_molecular_graphics     'Bruker SHELXTL' 
_computing_publication_material   'Bruker SHELXTL' 
  
_refine_special_details 
; 
 Refinement of F^2^ against ALL reflections.  The weighted R-factor wR and 
 goodness of fit S are based on F^2^, conventional R-factors R are based 
 on F, with F set to zero for negative F^2^. The threshold expression of 
 F^2^ > 2sigma(F^2^) is used only for calculating R-factors(gt) etc. and is 
 not relevant to the choice of reflections for refinement.  R-factors based 
 on F^2^ are statistically about twice as large as those based on F, and R- 
 factors based on ALL data will be even larger. 
; 
  
_refine_ls_structure_factor_coef  Fsqd 
_refine_ls_matrix_type            full 
_refine_ls_weighting_scheme       calc 
_refine_ls_weighting_details 
 'calc w=1/[\s^2^(Fo^2^)+(0.0866P)^2^+0.0000P] where P=(Fo^2^+2Fc^2^)/3' 
_atom_sites_solution_primary      direct 
_atom_sites_solution_secondary    difmap 
_atom_sites_solution_hydrogens    geom 
_refine_ls_hydrogen_treatment     mixed 
_refine_ls_extinction_method      none 
_refine_ls_extinction_coef        ? 
_refine_ls_number_reflns          5544 
_refine_ls_number_parameters      397 
_refine_ls_number_restraints      15 
_refine_ls_R_factor_all           0.0738 
_refine_ls_R_factor_gt            0.0486 
_refine_ls_wR_factor_ref          0.1502 
_refine_ls_wR_factor_gt           0.1383 
_refine_ls_goodness_of_fit_ref    1.058 
_refine_ls_restrained_S_all       1.131 
_refine_ls_shift/su_max           0.187 
_refine_ls_shift/su_mean          0.013 
  
loop_ 
 _atom_site_label 
 _atom_site_type_symbol 
 _atom_site_fract_x 
 _atom_site_fract_y 
 _atom_site_fract_z 
 _atom_site_U_iso_or_equiv 
 _atom_site_adp_type 
 _atom_site_occupancy 
 _atom_site_symmetry_multiplicity 
 _atom_site_calc_flag 
 _atom_site_refinement_flags 
 _atom_site_disorder_assembly 
 _atom_site_disorder_group 
N1 N -0.83613(5) 0.34400(13) -0.60365(9) 0.0372(3) Uani 1 1 d . . . 
H1N H -0.8598(10) 0.300(2) -0.6510(15) 0.066(6) Uiso 1 1 d . . . 
N2 N -0.77237(6) 0.23792(12) -0.71060(9) 0.0357(3) Uani 1 1 d . . . 
H2N H -0.8037(9) 0.2092(18) -0.7418(13) 0.049(5) Uiso 1 1 d . . . 
N3 N -0.62757(5) 0.56228(13) -0.42551(9) 0.0402(3) Uani 1 1 d . . . 
C1 C -0.84604(7) 0.40854(15) -0.53872(11) 0.0375(4) Uani 1 1 d . . . 
C2 C -0.89195(8) 0.42109(18) -0.52843(14) 0.0481(4) Uani 1 1 d . . . 
H2 H -0.9228(9) 0.381(2) -0.5709(14) 0.061(6) Uiso 1 1 d . . . 
C3 C -0.89172(8) 0.49190(19) -0.45730(14) 0.0524(5) Uani 1 1 d . . . 
H3 H -0.9235(9) 0.4981(19) -0.4490(13) 0.058(6) Uiso 1 1 d . . . 
C4 C -0.84668(8) 0.54705(17) -0.39674(13) 0.0468(4) Uani 1 1 d . . . 
H4 H -0.8480(8) 0.5920(18) -0.3436(12) 0.049(5) Uiso 1 1 d . . . 
C5 C -0.80072(7) 0.53447(15) -0.40631(11) 0.0397(4) Uani 1 1 d . . . 
H5 H -0.7686(8) 0.5715(18) -0.3617(13) 0.053(5) Uiso 1 1 d . . . 
C6 C -0.79994(6) 0.46486(13) -0.47885(10) 0.0338(3) Uani 1 1 d . . . 
C7 C -0.76070(6) 0.43291(13) -0.51049(10) 0.0321(3) Uani 1 1 d . . . 
C8 C -0.70823(6) 0.46089(14) -0.48306(10) 0.0333(3) Uani 1 1 d . . . 
C9 C -0.67301(7) 0.53050(17) -0.40187(11) 0.0383(4) Uani 1 1 d . . . 
H9B H -0.6870(7) 0.6104(17) -0.3871(11) 0.041(5) Uiso 1 1 d . . . 
H9A H -0.6608(8) 0.4762(18) -0.3440(13) 0.050(5) Uiso 1 1 d . . . 
C11 C -0.62638(7) 0.45880(16) -0.48939(12) 0.0401(4) Uani 1 1 d . . . 
H11B H -0.6129(7) 0.4964(18) -0.5329(12) 0.048(5) Uiso 1 1 d . . . 
H11A H -0.6021(8) 0.391(2) -0.4534(13) 0.056(6) Uiso 1 1 d . . . 
C12 C -0.68121(6) 0.41842(14) -0.53145(10) 0.0335(3) Uani 1 1 d . . . 
C13 C -0.70502(6) 0.34451(13) -0.60786(10) 0.0325(3) Uani 1 1 d . . . 
C14 C -0.68751(6) 0.28401(13) -0.66992(10) 0.0331(3) Uani 1 1 d . . . 
C15 C -0.64012(7) 0.27501(15) -0.67642(11) 0.0386(4) Uani 1 1 d . . . 
H15 H -0.6100(9) 0.3192(19) -0.6341(13) 0.052(5) Uiso 1 1 d . . . 
C16 C -0.63645(8) 0.20290(16) -0.74384(12) 0.0438(4) Uani 1 1 d . . . 
H16 H -0.6033(9) 0.1968(19) -0.7466(14) 0.058(6) Uiso 1 1 d . . . 
C17 C -0.67916(8) 0.14042(16) -0.80488(12) 0.0449(4) Uani 1 1 d . . . 
H17 H -0.6761(8) 0.0908(19) -0.8529(14) 0.059(6) Uiso 1 1 d . . . 
C18 C -0.72670(8) 0.14701(15) -0.80028(11) 0.0411(4) Uani 1 1 d . . . 
H18 H -0.7562(8) 0.1028(18) -0.8438(14) 0.056(6) Uiso 1 1 d . . . 
C19 C -0.73054(6) 0.21916(14) -0.73170(10) 0.0340(3) Uani 1 1 d . . . 
C20 C -0.75741(6) 0.31338(13) -0.63551(10) 0.0324(3) Uani 1 1 d . . . 
C21 C -0.78512(6) 0.35829(13) -0.58756(10) 0.0328(3) Uani 1 1 d . . . 
C22 C -0.57780(8) 0.5676(2) -0.34526(14) 0.0552(5) Uani 1 1 d . . . 
H22C H -0.5514(9) 0.5895(19) -0.3644(14) 0.058(6) Uiso 1 1 d . . . 
H22B H -0.5710(9) 0.481(2) -0.3163(15) 0.066(7) Uiso 1 1 d . . . 
H22A H -0.5810(8) 0.632(2) -0.3021(14) 0.060(6) Uiso 1 1 d . . . 
C23 C -0.63744(9) 0.68688(18) -0.47302(14) 0.0505(5) Uani 1 1 d . . . 
H23C H -0.6741(9) 0.6812(19) -0.5265(14) 0.058(6) Uiso 1 1 d . . . 
H23B H -0.6390(8) 0.752(2) -0.4305(13) 0.056(5) Uiso 1 1 d . . . 
H23A H -0.6070(9) 0.7024(19) -0.4909(14) 0.064(6) Uiso 1 1 d . . . 
F1 F -0.50146(19) 0.6818(6) 0.1264(5) 0.095(2) Uani 0.588(9) 1 d PD A 1 
F2 F -0.46556(17) 0.6752(9) 0.0364(2) 0.109(3) Uani 0.588(9) 1 d PD A 1 
F3 F -0.46798(14) 0.5152(3) 0.1106(4) 0.0939(15) Uani 0.588(9) 1 d PD A 1 
F1' F -0.4998(4) 0.6391(15) 0.1331(8) 0.166(6) Uani 0.412(9) 1 d PD A 2 
F2' F -0.4781(4) 0.7698(10) 0.0697(8) 0.178(4) Uani 0.412(9) 1 d PD A 2 
F3' F -0.4631(3) 0.588(2) 0.0495(10) 0.228(10) Uani 0.412(9) 1 d PD A 2 
O1 O -0.41229(7) 0.7200(2) 0.25605(12) 0.1002(7) Uani 1 1 d . . . 
O2 O -0.37261(5) 0.64443(14) 0.17425(10) 0.0611(4) Uani 1 1 d . . . 
C25 C -0.46219(9) 0.6469(3) 0.11336(16) 0.0704(7) Uani 1 1 d D . . 
C26 C -0.40986(7) 0.67451(19) 0.18917(13) 0.0508(5) Uani 1 1 d . A . 
  
loop_ 
 _atom_site_aniso_label 
 _atom_site_aniso_U_11 
 _atom_site_aniso_U_22 
 _atom_site_aniso_U_33 
 _atom_site_aniso_U_23 
 _atom_site_aniso_U_13 
 _atom_site_aniso_U_12 
N1 0.0363(8) 0.0353(7) 0.0374(8) -0.0021(6) 0.0121(6) -0.0030(6) 
N2 0.0384(8) 0.0321(7) 0.0310(7) -0.0037(6) 0.0079(6) -0.0028(6) 
N3 0.0378(8) 0.0417(8) 0.0370(7) -0.0106(6) 0.0107(6) -0.0031(6) 
C1 0.0428(9) 0.0328(8) 0.0381(9) 0.0067(7) 0.0175(7) 0.0012(7) 
C2 0.0444(10) 0.0496(10) 0.0526(11) 0.0009(9) 0.0219(9) -0.0032(8) 
C3 0.0527(12) 0.0521(11) 0.0633(12) 0.0036(10) 0.0346(10) 0.0031(9) 
C4 0.0590(12) 0.0409(9) 0.0481(11) 0.0021(8) 0.0295(9) 0.0051(8) 
C5 0.0488(10) 0.0316(8) 0.0388(9) 0.0022(7) 0.0176(8) 0.0040(7) 
C6 0.0399(9) 0.0269(7) 0.0348(8) 0.0063(6) 0.0151(7) 0.0044(6) 
C7 0.0378(8) 0.0258(7) 0.0306(8) 0.0042(6) 0.0114(6) 0.0033(6) 
C8 0.0383(8) 0.0286(7) 0.0284(8) 0.0004(6) 0.0082(6) 0.0030(6) 
C9 0.0366(9) 0.0414(9) 0.0348(9) -0.0061(7) 0.0120(7) -0.0016(7) 
C11 0.0398(9) 0.0389(9) 0.0389(9) -0.0105(7) 0.0130(8) -0.0004(7) 
C12 0.0370(8) 0.0280(7) 0.0317(8) 0.0003(6) 0.0098(7) 0.0028(6) 
C13 0.0384(9) 0.0263(7) 0.0291(7) 0.0014(6) 0.0096(6) 0.0023(6) 
C14 0.0422(9) 0.0256(7) 0.0292(7) 0.0003(6) 0.0118(7) 0.0009(6) 
C15 0.0456(10) 0.0337(8) 0.0375(9) -0.0008(7) 0.0175(8) -0.0024(7) 
C16 0.0572(12) 0.0370(9) 0.0459(10) -0.0017(8) 0.0298(9) -0.0020(8) 
C17 0.0672(13) 0.0345(9) 0.0407(9) -0.0064(7) 0.0296(9) -0.0065(8) 
C18 0.0563(11) 0.0317(8) 0.0326(8) -0.0043(7) 0.0149(8) -0.0059(7) 
C19 0.0426(9) 0.0273(7) 0.0298(8) 0.0028(6) 0.0120(7) 0.0012(6) 
C20 0.0386(8) 0.0250(7) 0.0292(8) 0.0020(6) 0.0088(6) 0.0015(6) 
C21 0.0371(8) 0.0256(7) 0.0327(8) 0.0042(6) 0.0108(7) 0.0018(6) 
C22 0.0375(10) 0.0729(15) 0.0457(11) -0.0221(11) 0.0067(9) -0.0062(9) 
C23 0.0626(13) 0.0393(10) 0.0536(12) -0.0062(9) 0.0272(11) -0.0049(9) 
F1 0.039(2) 0.129(3) 0.112(4) -0.048(3) 0.0246(19) 0.005(2) 
F2 0.060(2) 0.213(8) 0.0392(19) 0.026(3) 0.0038(15) -0.031(3) 
F3 0.068(2) 0.076(2) 0.114(3) -0.0414(19) 0.0112(18) -0.0348(14) 
F1' 0.069(5) 0.295(14) 0.122(6) 0.023(7) 0.026(4) -0.099(7) 
F2' 0.147(6) 0.180(8) 0.137(7) 0.047(7) -0.016(5) 0.012(6) 
F3' 0.066(4) 0.38(2) 0.194(13) -0.236(15) 0.008(7) -0.013(9) 
O1 0.0669(11) 0.1534(19) 0.0840(12) -0.0679(12) 0.0341(10) -0.0435(12) 
O2 0.0415(8) 0.0722(9) 0.0644(9) -0.0077(7) 0.0158(7) -0.0082(6) 
C25 0.0420(12) 0.102(2) 0.0672(15) -0.0202(14) 0.0218(11) -0.0160(12) 
C26 0.0436(11) 0.0563(11) 0.0514(11) -0.0088(9) 0.0179(9) -0.0175(8) 
  
_geom_special_details 
; 
 All esds (except the esd in the dihedral angle between two l.s. planes) 
 are estimated using the full covariance matrix.  The cell esds are taken 
 into account individually in the estimation of esds in distances, angles 
 and torsion angles; correlations between esds in cell parameters are only 
 used when they are defined by crystal symmetry.  An approximate (isotropic) 
 treatment of cell esds is used for estimating esds involving l.s. planes. 
; 
  
loop_ 
 _geom_bond_atom_site_label_1 
 _geom_bond_atom_site_label_2 
 _geom_bond_distance 
 _geom_bond_site_symmetry_2 
 _geom_bond_publ_flag 
N1 C21 1.370(2) . ? 
N1 C1 1.383(2) . ? 
N2 C19 1.374(2) . ? 
N2 C20 1.3829(19) . ? 
N3 C22 1.496(2) . ? 
N3 C23 1.501(2) . ? 
N3 C9 1.522(2) . ? 
N3 C11 1.524(2) . ? 
C1 C2 1.383(2) . ? 
C1 C6 1.414(2) . ? 
C2 C3 1.382(3) . ? 
C3 C4 1.394(3) . ? 
C4 C5 1.378(3) . ? 
C5 C6 1.405(2) . ? 
C6 C7 1.441(2) . ? 
C7 C8 1.402(2) . ? 
C7 C21 1.413(2) . ? 
C8 C12 1.378(2) . ? 
C8 C9 1.499(2) . ? 
C11 C12 1.489(2) . ? 
C12 C13 1.399(2) . ? 
C13 C20 1.407(2) . ? 
C13 C14 1.445(2) . ? 
C14 C15 1.391(2) . ? 
C14 C19 1.413(2) . ? 
C15 C16 1.379(2) . ? 
C16 C17 1.391(3) . ? 
C17 C18 1.380(3) . ? 
C18 C19 1.397(2) . ? 
C20 C21 1.396(2) . ? 
F1 C25 1.268(4) . ? 
F2 C25 1.261(4) . ? 
F3 C25 1.404(4) . ? 
F1' C25 1.233(8) . ? 
F2' C25 1.468(8) . ? 
F3' C25 1.209(6) . ? 
O1 C26 1.222(2) . ? 
O2 C26 1.217(2) . ? 
C25 C26 1.534(3) . ? 
  
loop_ 
 _geom_angle_atom_site_label_1 
 _geom_angle_atom_site_label_2 
 _geom_angle_atom_site_label_3 
 _geom_angle 
 _geom_angle_site_symmetry_1 
 _geom_angle_site_symmetry_3 
 _geom_angle_publ_flag 
C21 N1 C1 108.62(14) . . ? 
C19 N2 C20 108.50(14) . . ? 
C22 N3 C23 109.71(16) . . ? 
C22 N3 C9 112.44(14) . . ? 
C23 N3 C9 108.92(14) . . ? 
C22 N3 C11 110.97(14) . . ? 
C23 N3 C11 109.18(14) . . ? 
C9 N3 C11 105.49(12) . . ? 
N1 C1 C2 129.05(17) . . ? 
N1 C1 C6 109.06(14) . . ? 
C2 C1 C6 121.89(16) . . ? 
C3 C2 C1 117.75(19) . . ? 
C2 C3 C4 121.46(18) . . ? 
C5 C4 C3 121.11(17) . . ? 
C4 C5 C6 118.71(17) . . ? 
C5 C6 C1 119.05(15) . . ? 
C5 C6 C7 134.50(15) . . ? 
C1 C6 C7 106.46(13) . . ? 
C8 C7 C21 118.89(14) . . ? 
C8 C7 C6 134.93(15) . . ? 
C21 C7 C6 106.17(14) . . ? 
C12 C8 C7 120.51(14) . . ? 
C12 C8 C9 110.13(14) . . ? 
C7 C8 C9 129.31(14) . . ? 
C8 C9 N3 102.43(12) . . ? 
C12 C11 N3 102.67(13) . . ? 
C8 C12 C13 121.06(15) . . ? 
C8 C12 C11 110.90(14) . . ? 
C13 C12 C11 128.02(14) . . ? 
C12 C13 C20 119.28(14) . . ? 
C12 C13 C14 134.23(15) . . ? 
C20 C13 C14 106.47(13) . . ? 
C15 C14 C19 119.69(14) . . ? 
C15 C14 C13 134.09(15) . . ? 
C19 C14 C13 106.16(14) . . ? 
C16 C15 C14 118.80(16) . . ? 
C15 C16 C17 121.08(17) . . ? 
C18 C17 C16 121.66(16) . . ? 
C17 C18 C19 117.49(17) . . ? 
N2 C19 C18 129.18(16) . . ? 
N2 C19 C14 109.53(13) . . ? 
C18 C19 C14 121.27(16) . . ? 
N2 C20 C21 130.88(15) . . ? 
N2 C20 C13 109.35(13) . . ? 
C21 C20 C13 119.77(14) . . ? 
N1 C21 C20 129.84(15) . . ? 
N1 C21 C7 109.69(13) . . ? 
C20 C21 C7 120.47(15) . . ? 
F3' C25 F1' 118.0(8) . . ? 
F3' C25 F2 44.9(10) . . ? 
F1' C25 F2 123.3(6) . . ? 
F3' C25 F1 125.4(5) . . ? 
F1' C25 F1 21.3(8) . . ? 
F2 C25 F1 112.1(5) . . ? 
F3' C25 F3 59.8(11) . . ? 
F1' C25 F3 80.8(7) . . ? 
F2 C25 F3 104.1(4) . . ? 
F1 C25 F3 101.4(3) . . ? 
F3' C25 F2' 98.1(9) . . ? 
F1' C25 F2' 93.2(7) . . ? 
F2 C25 F2' 54.3(5) . . ? 
F1 C25 F2' 72.7(6) . . ? 
F3 C25 F2' 149.0(4) . . ? 
F3' C25 C26 118.5(4) . . ? 
F1' C25 C26 117.3(6) . . ? 
F2 C25 C26 115.2(3) . . ? 
F1 C25 C26 116.0(3) . . ? 
F3 C25 C26 106.2(2) . . ? 
F2' C25 C26 103.5(4) . . ? 
O2 C26 O1 130.2(2) . . ? 
O2 C26 C25 115.05(18) . . ? 
O1 C26 C25 114.69(18) . . ? 
  
_diffrn_measured_fraction_theta_max    0.994 
_diffrn_reflns_theta_full              28.28 
_diffrn_measured_fraction_theta_full   0.994 
_refine_diff_density_max    0.354 
_refine_diff_density_min   -0.245 
_refine_diff_density_rms    0.041 
